# Supplementary material
Source: PubMed Central journal article supplement (PMC7372534)
Supplement: NIHMS1603619-supplement-Supplementary_Information.pdf [file NIHMS1603619-supplement-Supplementary_Information.pdf]

# Design of a transcriptional biosensor for the portable, on-demand detection of cyanuric acid

Xiangyang Liu<sup>1,\*</sup>, Adam D. Silverman<sup>2,3,4\*</sup>, Khalid K. Alam<sup>2,3,4</sup>, Erik Iverson<sup>5</sup>, Julius B. Lucks<sup>2,3,4</sup>, Michael C. Jewett<sup>2,3</sup> & Srivatsan Raman<sup>5,6</sup>

1 Biophysics Graduate Program, University of Wisconsin, Madison, WI, USA

2 Department of Chemical and Biological Engineering, Northwestern University, Evanston, IL, USA

3 Center for Synthetic Biology, Northwestern University, Evanston, IL, USA

4 Center for Water Research, Northwestern University, Evanston, IL, USA

5 Department of Biochemistry, University of Wisconsin, Madison, WI, USA

6 Department of Bacteriology, University of Wisconsin, Madison, WI, USA

\*These authors contributed equally

Corresponding authors: Srivatsan Raman ([sraman4@wisc.edu](mailto:sraman4@wisc.edu)), Michael Jewett ([m-jewett@northwestern.edu](mailto:m-jewett@northwestern.edu)), and Julius Lucks ([iblucks@northwestern.edu](mailto:iblucks@northwestern.edu))

## Supplementary Information

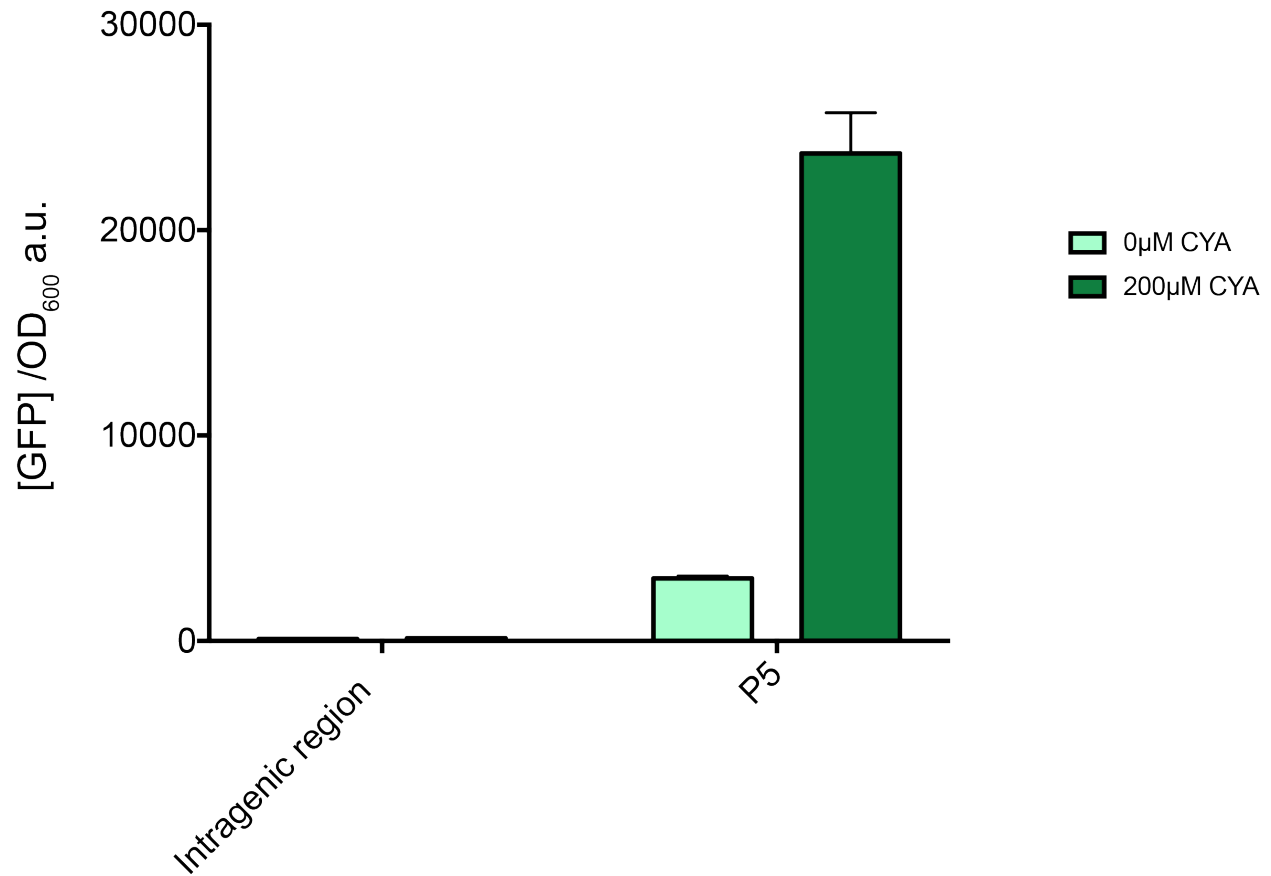

**Supplemental Figure 1: Cellular expression comparison between *atzRDEF* intragenic region and hybrid promoter P5.** Transcriptional activation was monitored by production of a downstream superfolder green fluorescent protein (sfGFP). Expression levels are calculated as sfGFP fluorescence (excitation: 488nm emission: 510nm) over cell optical density (at 600nm). Bars indicate the average of experimental triplicate with error bars depicting  $\pm$  standard deviation.

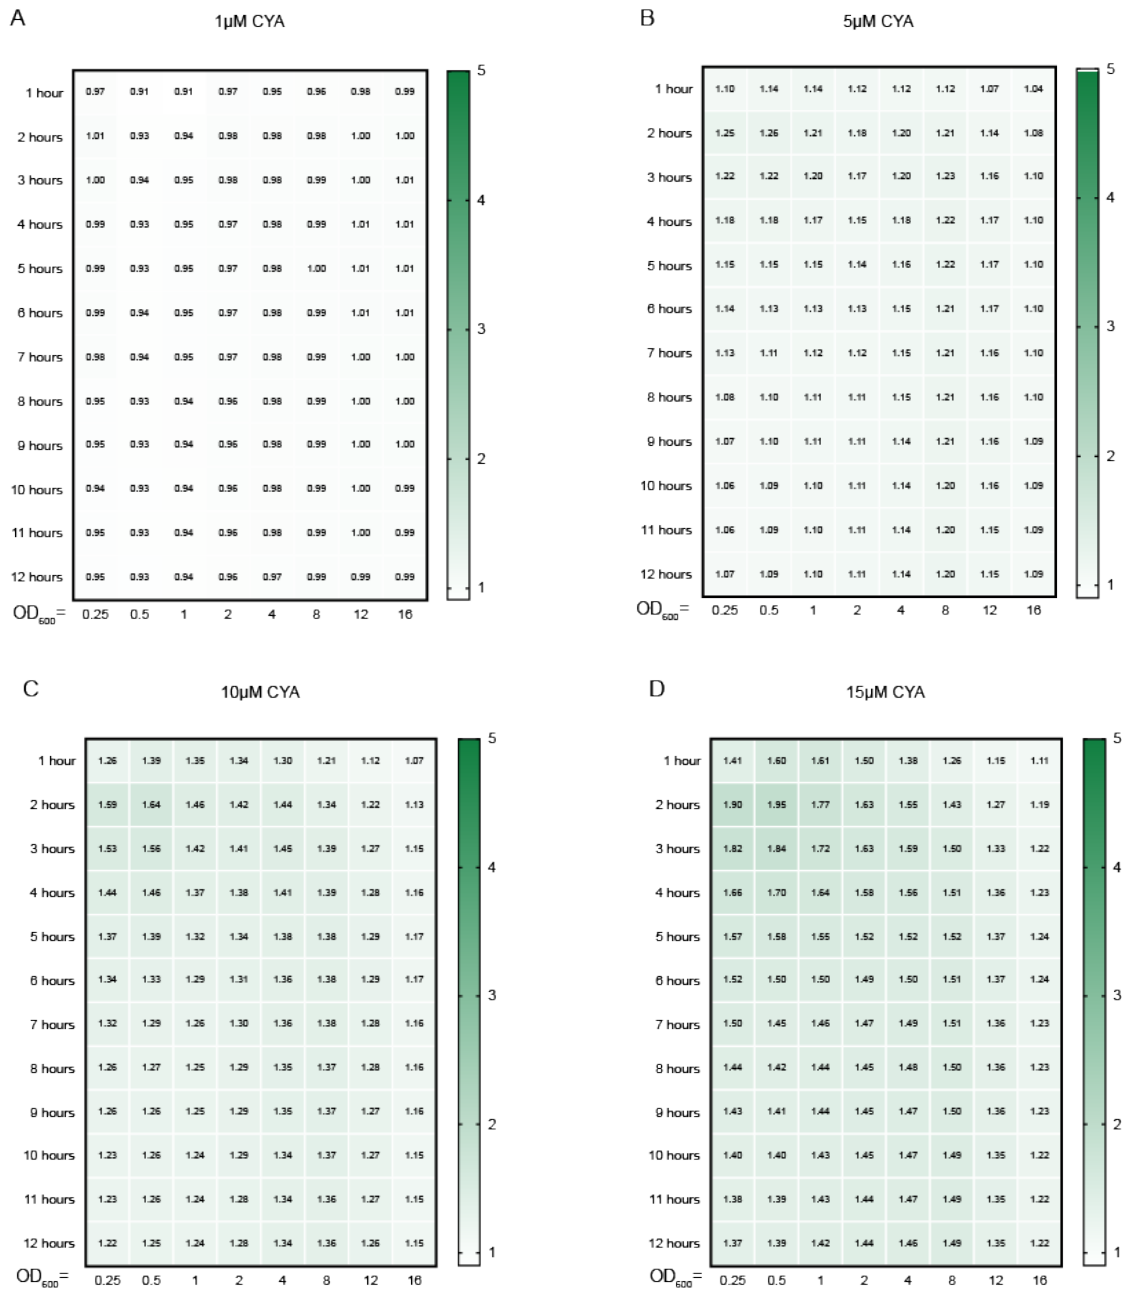

**Supplemental Figure 2. Performance of a whole-cell *E. coli* cyanuric acid sensor across time and optical densities at all tested CYA concentrations.** Fold-induction of the whole-cell cyanuric acid (CYA) sensor measured as ratio of reporter fluorescence in the presence or absence of 1 μM (A), 5 μM (B), 10 μM (C), 15 μM (D), 20 μM (E), 30 μM (F), 40 μM (G), 50 μM (H), 75 μM (I), 100 μM (J), 150 μM (K), 190 μM (L), 385 μM (M), 580 μM (N), 770 μM (O), 960 μM (P) CYA. Average fold-inductions of 3 biological replicates are shown.

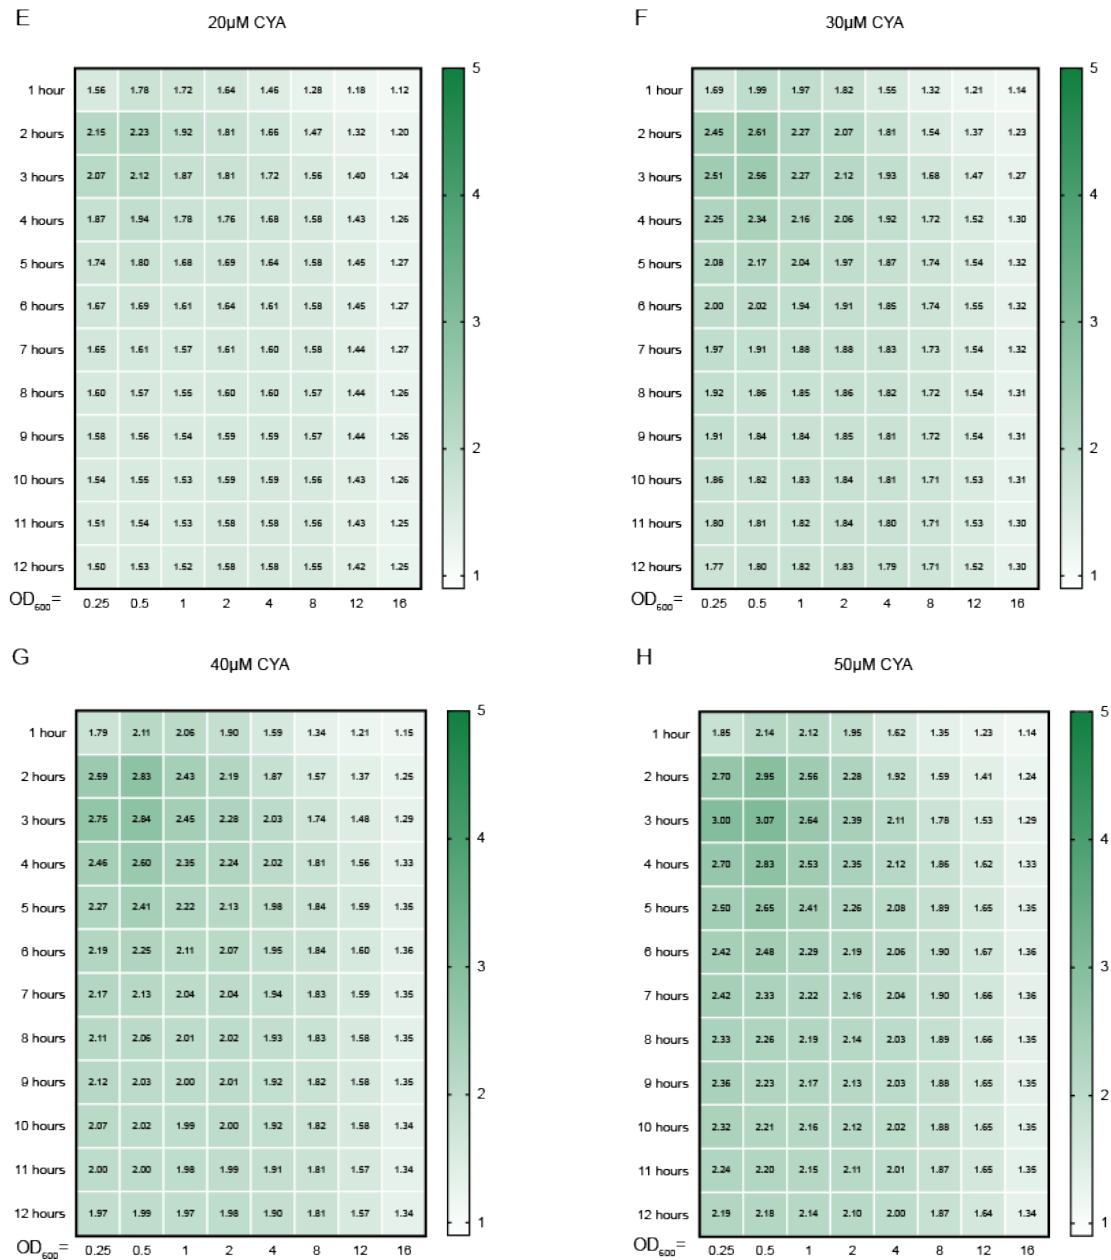

**Supplemental Figure 2. Performance of a whole-cell *E. coli* cyanuric acid sensor across time and optical densities at all tested CYA concentrations.** Fold-induction of the whole-cell cyanuric acid (CYA) sensor measured as ratio of reporter fluorescence in the presence or absence of 1 μM (A), 5 μM (B), 10 μM (C), 15 μM (D), 20 μM (E), 30 μM (F), 40 μM (G), 50 μM (H), 75 μM (I), 100 μM (J), 150 μM (K), 190 μM (L), 385 μM (M), 580 μM (N), 770 μM (O), 960 μM (P) CYA. Average fold-inductions of 3 biological replicates are shown.

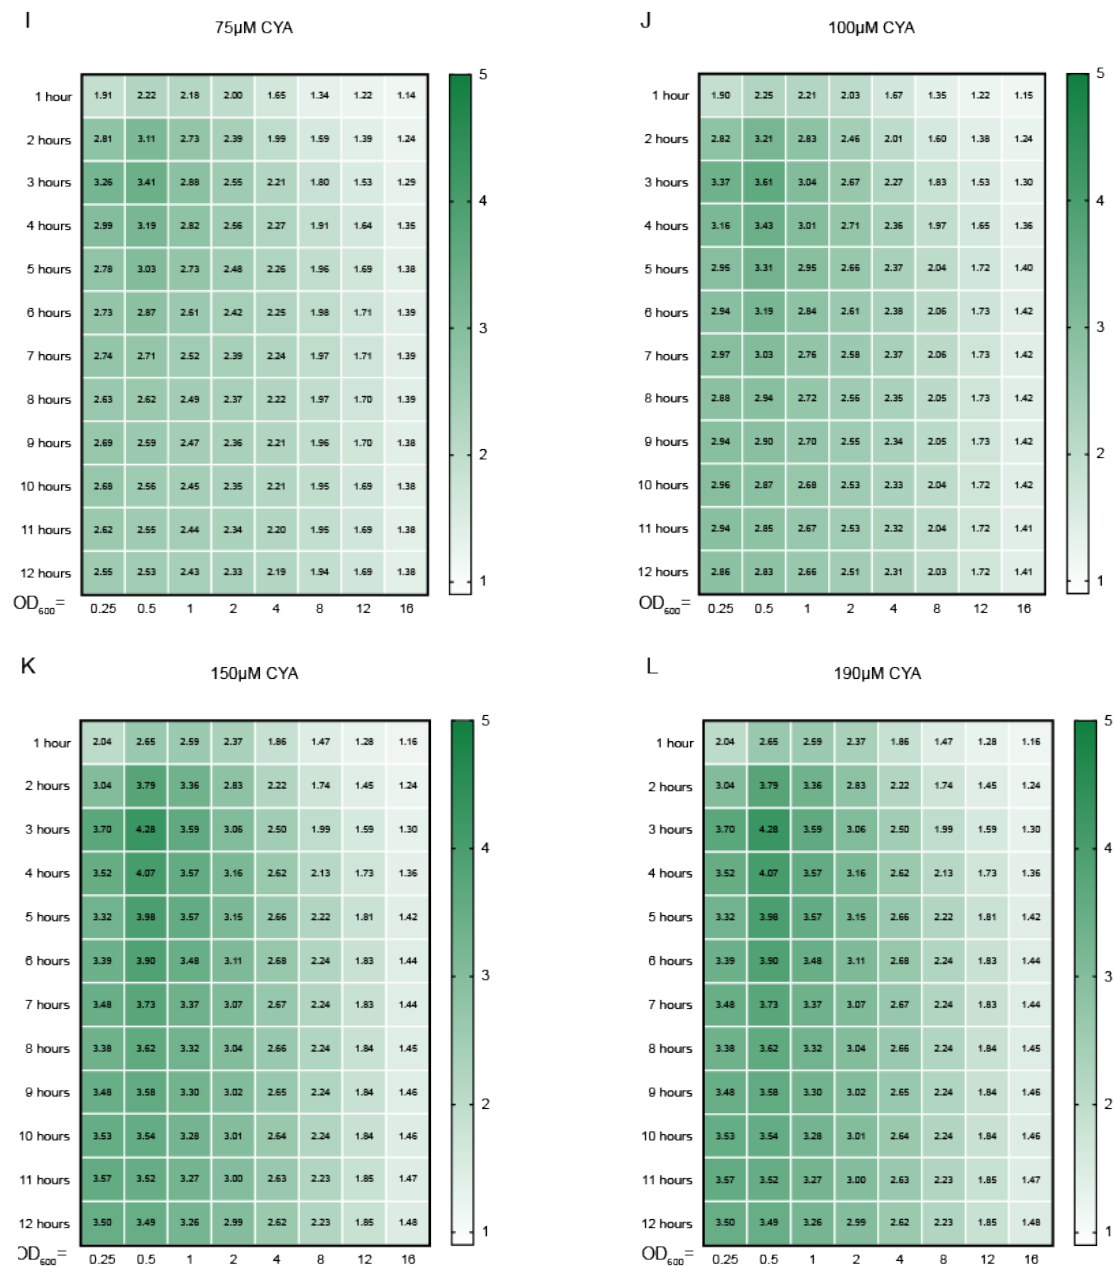

**Supplemental Figure 2. Performance of a whole-cell *E. coli* cyanuric acid sensor across time and optical densities at all tested CYA concentrations.** Fold-induction of the whole-cell cyanuric acid (CYA) sensor measured as ratio of reporter fluorescence in the presence or absence of 1 μM (A), 5 μM (B), 10 μM (C), 15 μM (D), 20 μM (E), 30 μM (F), 40 μM (G), 50 μM (H), 75 μM (I), 100 μM (J), 150 μM (K), 190 μM (L), 385 μM (M), 580 μM (N), 770 μM (O), 960 μM (P) CYA. Average fold-inductions of 3 biological replicates are shown.

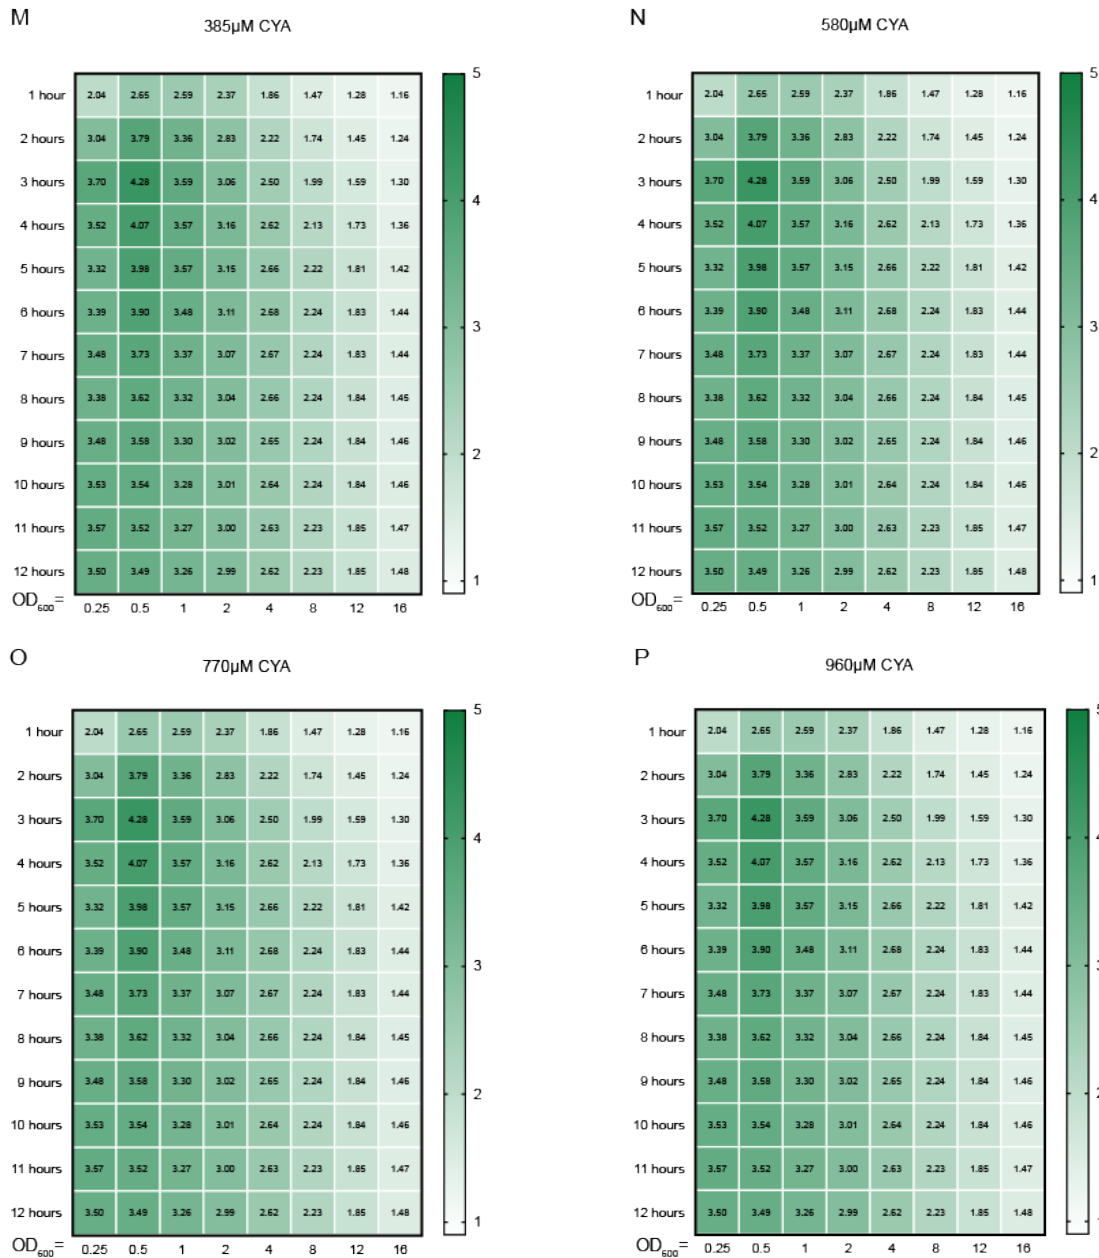

**Supplemental Figure 2. Performance of a whole-cell *E. coli* cyanuric acid sensor across time and optical densities at all tested CYA concentrations.** Fold-induction of the whole-cell cyanuric acid (CYA) sensor measured as ratio of reporter fluorescence in the presence or absence of 1 μM (A), 5 μM (B), 10 μM (C), 15 μM (D), 20 μM (E), 30 μM (F), 40 μM (G), 50 μM (H), 75 μM (I), 100 μM (J), 150 μM (K), 190 μM (L), 385 μM (M), 580 μM (N), 770 μM (O), 960 μM (P) CYA. Average fold-inductions of 3 biological replicates are shown.

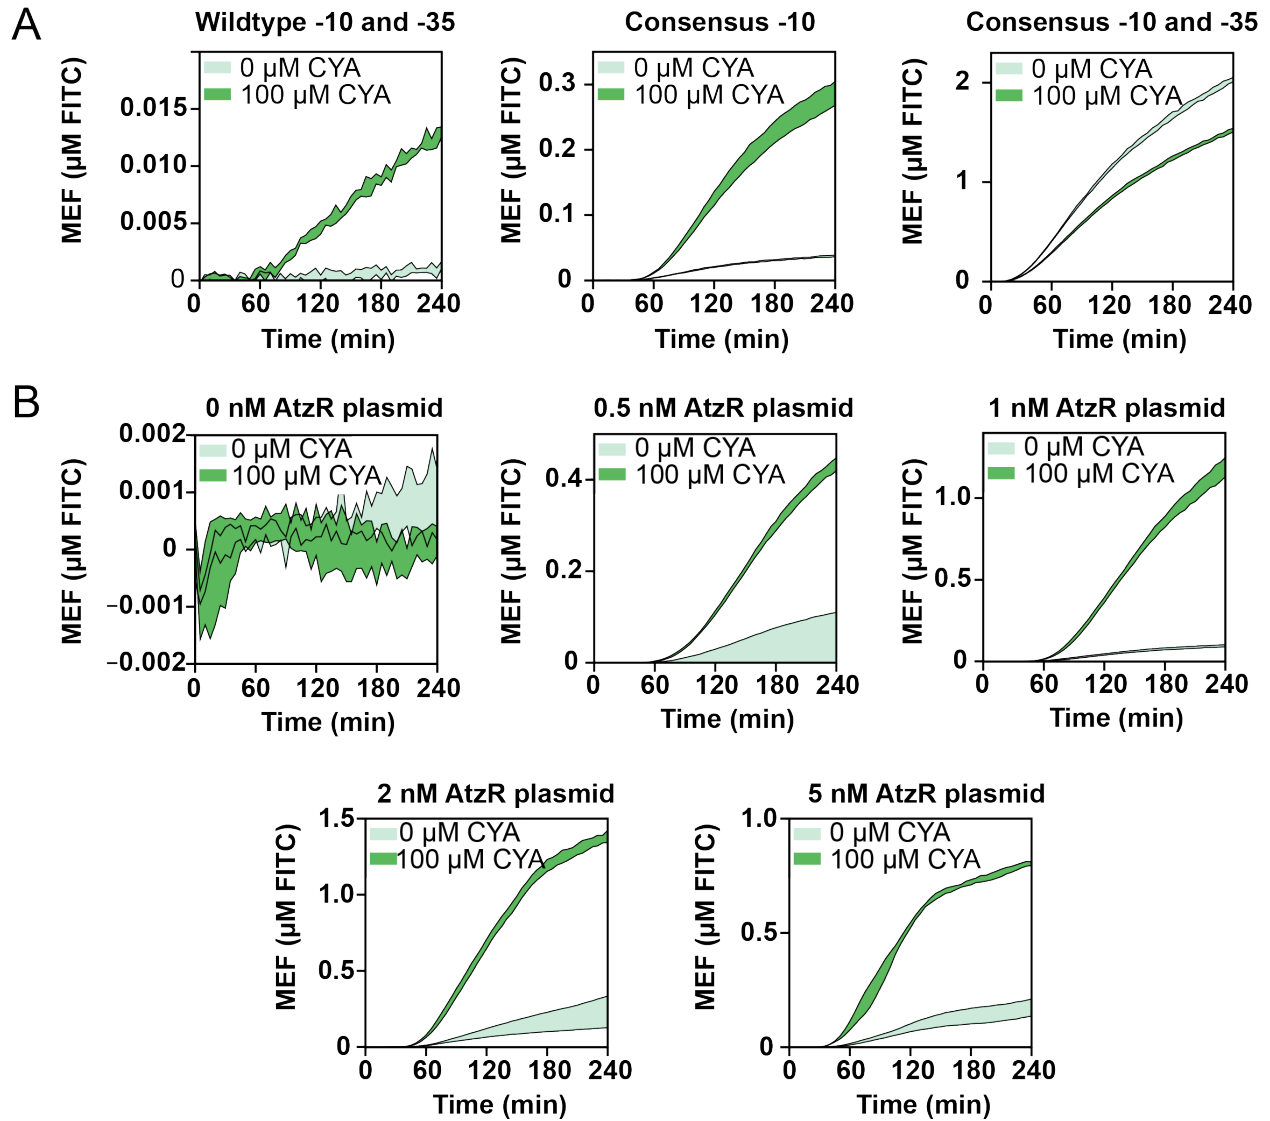

**Supplemental Figure 3: Kinetics of cyanuric acid reporter optimization in cell-free extracts.** (A) 4-hour time courses showing the differential kinetic responses of the data in Fig. 3b of the main manuscript for cell-free reporter designs. (B) 4-hour time courses showing the differential kinetic responses of the data in Fig. 3c of the main manuscript for AtzR plasmid concentration. Error shading represents one standard deviation from 3 technical replicates. Fluorescence is reported standardized to mean equivalent fluorescence (MEF) of fluorescein isothiocyanate based on a previously developed standard.

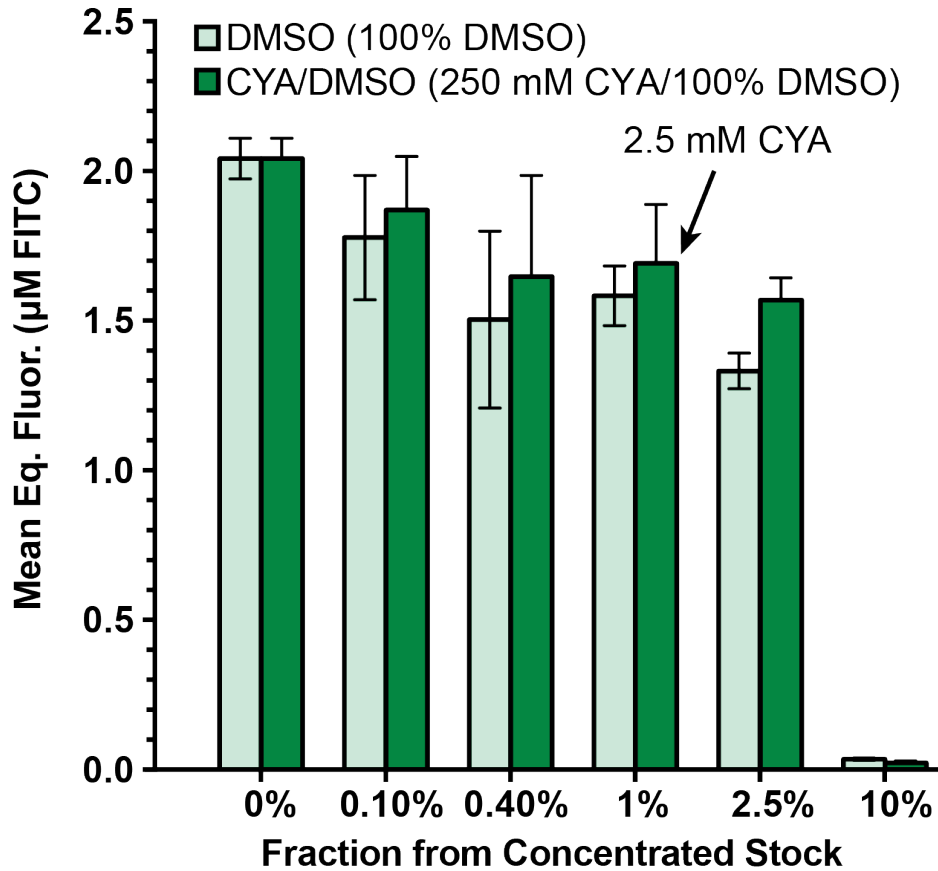

**Supplemental Figure 4: Cyanuric acid inhibition of cell-free protein synthesis.** A stock of either 250 mM cyanuric acid (dissolved in DMSO) or pure DMSO was serially diluted into a cell-free reaction constitutively expressing sfGFP without any transcription regulation. A value of 1% implies that the reaction was supplemented either with DMSO or 250 mM cyanuric acid (dissolved in DMSO), to a final volume fraction of 1%. Error bars represent 1 standard deviation from 3 technical replicates. Fluorescence is reported standardized to mean equivalent fluorescence (MEF) of fluorescein isothiocyanate based on a previously developed standard.



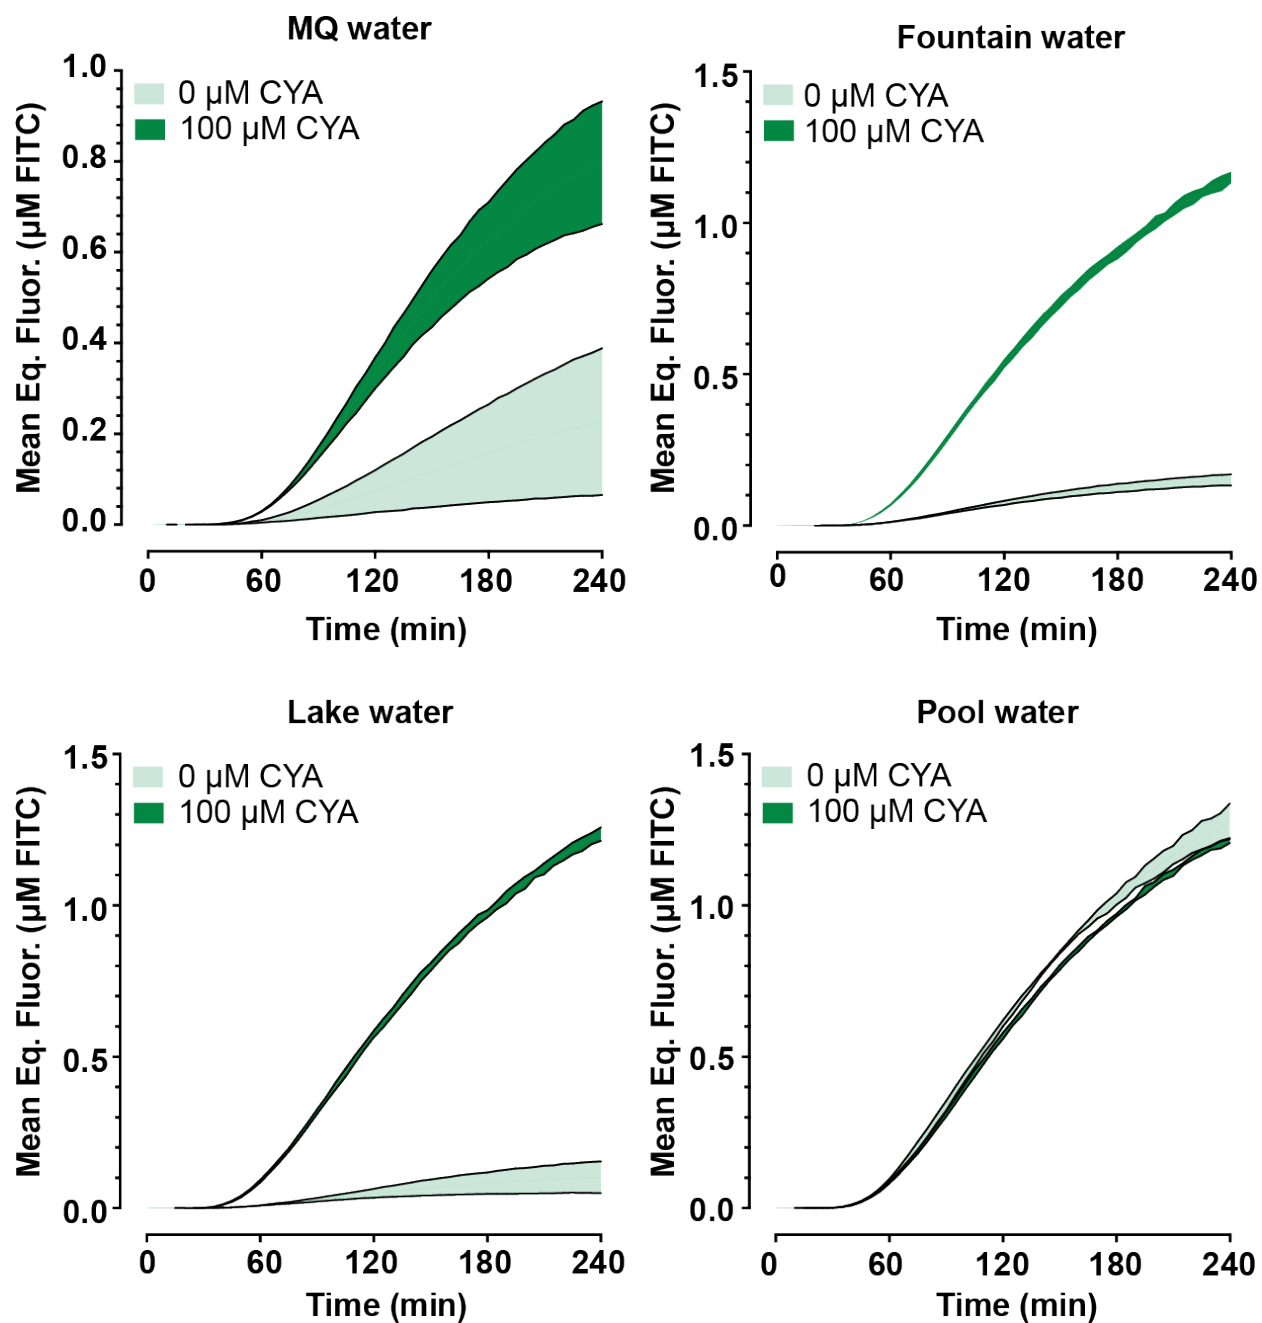

**Supplemental Figure 5: Kinetics of freeze-dried cell-free detection of cyanuric acid.** 4-hour time courses showing the differential kinetic responses of the data in **Fig. 4b** of the main manuscript for detecting MilliQ, fountain, lake, and pool water, with externally supplemented cyanuric acid. Error shading represent 1 standard deviation from 3 technical replicates. Fluorescence is reported standardized to mean equivalent fluorescence (MEF) of fluorescein isothiocyanate based on a previously developed standard.

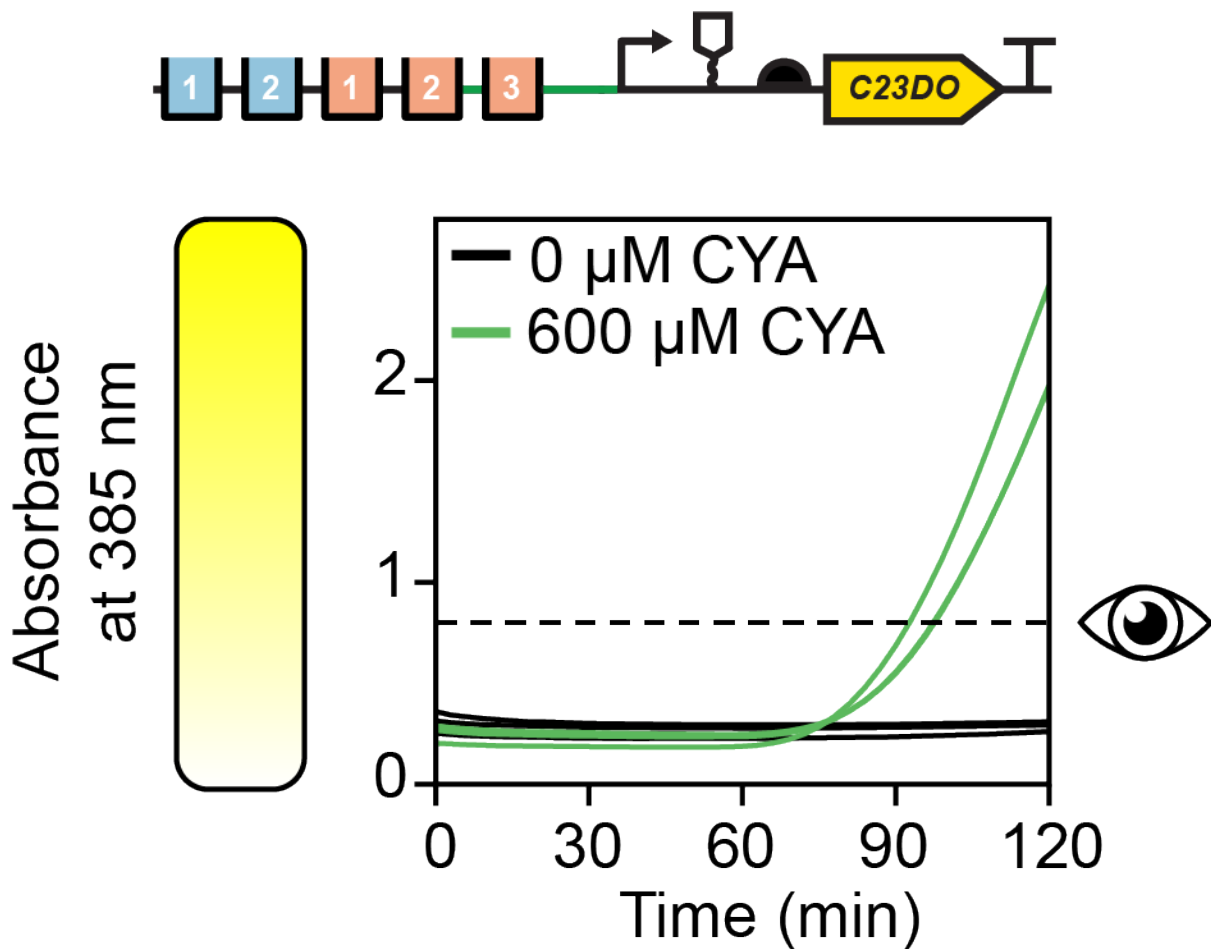

**Supplemental Figure 6: Kinetics of cell-free colorimetric reporter.** 2-hour time course showing the kinetic response, measured on a plate reader, of the C23DO reporter in response to high (600  $\mu\text{M}$ ) cyanuric acid or plain water. The eye icon to the right of the graph represents the estimated visible threshold of absorbance based on previous empirical measurements from our lab.<sup>1</sup>

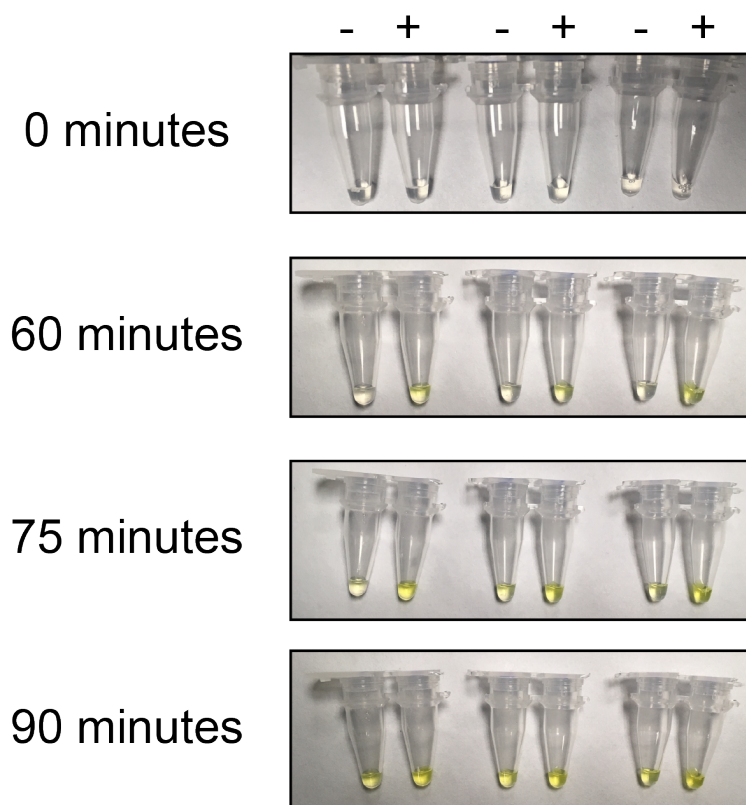

**Supplemental Figure 7: Kinetics for equipment-free visual detection of cyanuric acid.** Uncropped images from **Fig. 4d** of the main manuscript including technical replicates and an additional measured time point.

| <b>Component</b>                | <b>Cost/10 <math>\mu</math>L reaction</b> | <b>Cost/100 reactions</b> |
|---------------------------------|-------------------------------------------|---------------------------|
| Postlysis processed extract     | \$0.010                                   | \$0.97                    |
| Phosphoenolpyruvate (PEP)       | \$0.017                                   | \$1.74                    |
| Nucleotide triphosphates (NTPs) | \$0.007                                   | \$0.75                    |
| Midiprep plasmid DNA            | \$0.006                                   | \$0.57                    |
| All other reagents              | \$0.008                                   | \$0.81                    |
| <b>Total</b>                    | <b>\$0.048</b>                            | <b>\$4.84</b>             |

**Supplemental Table 1:** Estimated raw cost of a cell-free cyanuric acid sensor. Calculations were made based on 2019 commercial prices for commodity chemicals available from Sigma-Fisher and the referenced protocol<sup>2</sup>. The following additional assumptions were made: 3 mL of extract obtained per liter of culture; 100  $\mu$ g plasmid DNA obtained per midiprep kit; 5 nM reporter plasmid and 1 nM transcription factor plasmid, and 2 mM catechol supplied to the reaction. Only raw materials costs (excepting labor and capital) were considered in this calculation.

## References

- 1 Verosloff, M., Chappell, J., Perry, K. L., Thompson, J. R. & Lucks, J. B. PLANT-Dx: A Molecular Diagnostic for Point-of-Use Detection of Plant Pathogens. *ACS Synth. Biol.* **8**, 902-905, doi:10.1021/acssynbio.8b00526 (2019).
- 2 Silverman, A. D., Kelley-Loughnane, N., Lucks, J. B. & Jewett, M. C. Deconstructing Cell-Free Extract Preparation for in Vitro Activation of Transcriptional Genetic Circuitry. *ACS Synt. Biol.* **8**, 403-414, doi:10.1021/acssynbio.8b00430 (2019).
